# Supplementary figures and images for: A rise in NAD precursor nicotinamide mononucleotide (NMN) after injury promotes axon degeneration
Source: PubMed Central journal article supplement — Cell Death Differ. 2014 Oct 17;22(5):731–42. doi: 10.1038/cdd.2014.164 (PMC4392071; doi:10.1038/cdd.2014.164), 2014-10-17

**(A)** Time after FK866 addition (days)

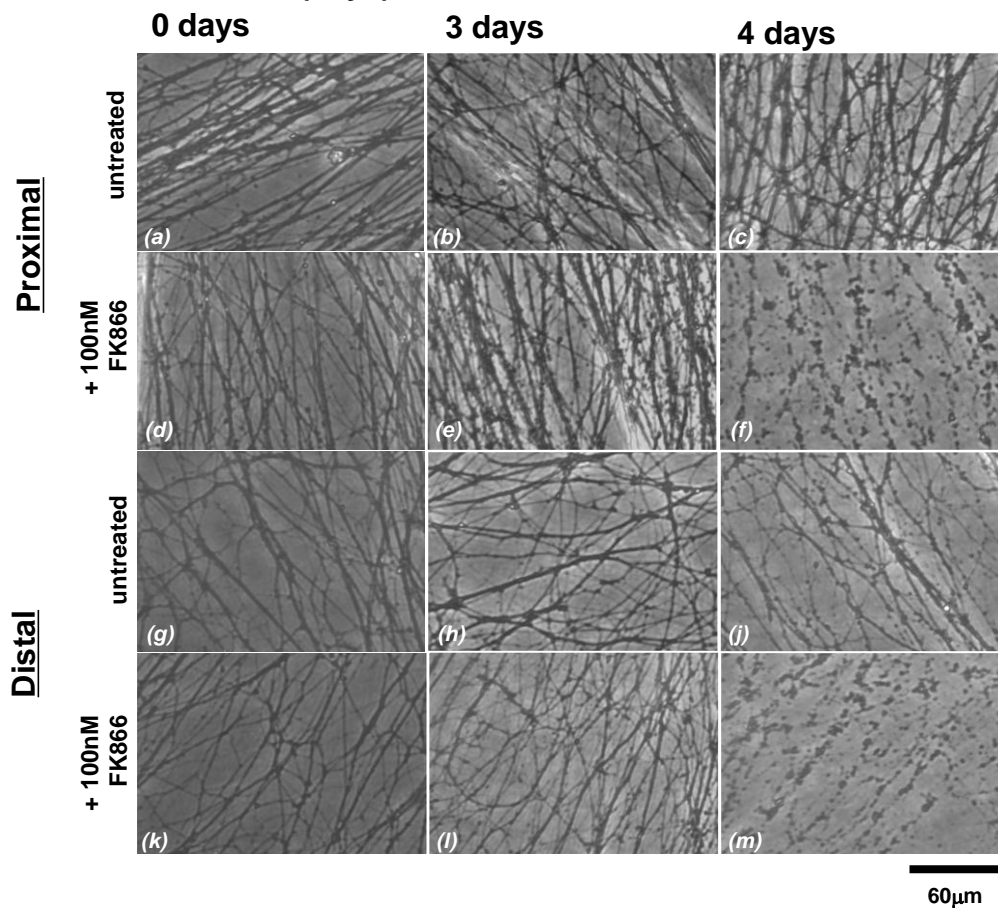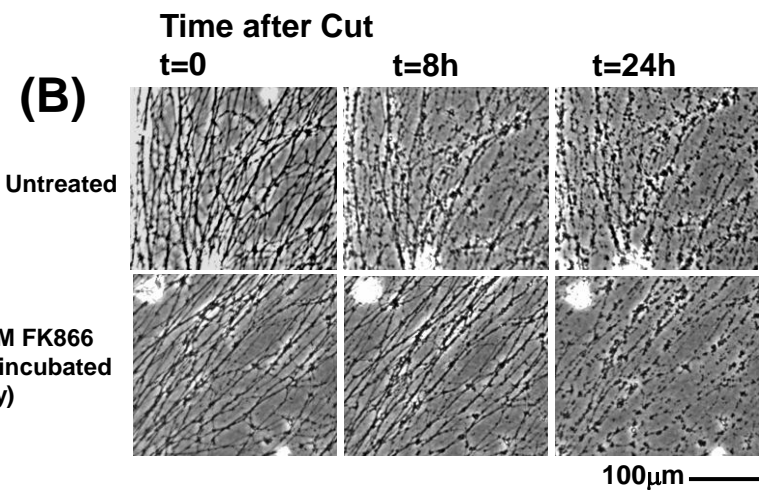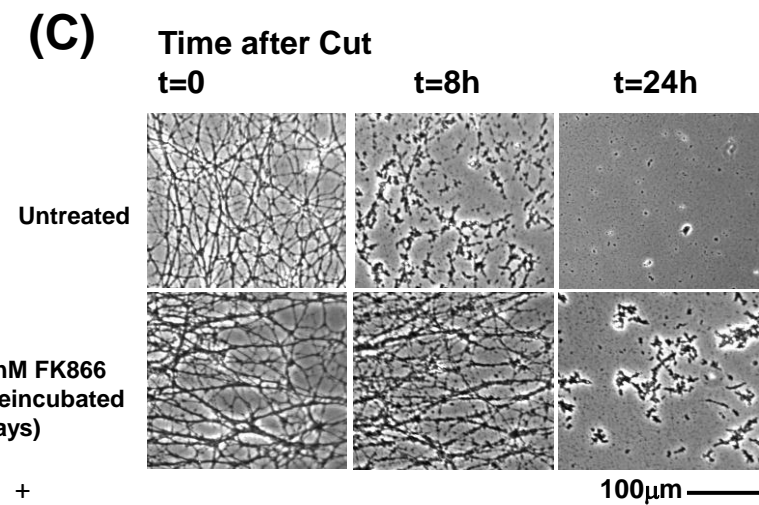

**(D)**

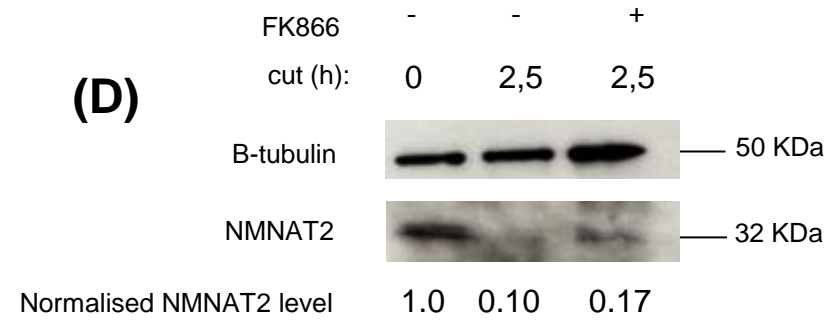

Supplement: cdd2014164x1.pdf [file cdd2014164x1.pdf]

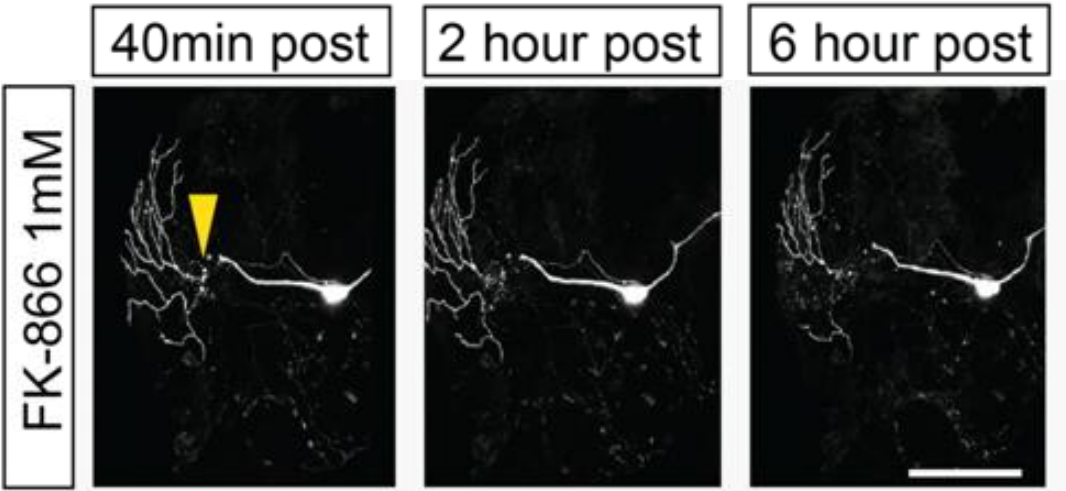

Supplement: cdd2014164x10.pdf [file cdd2014164x10.pdf]

(A)

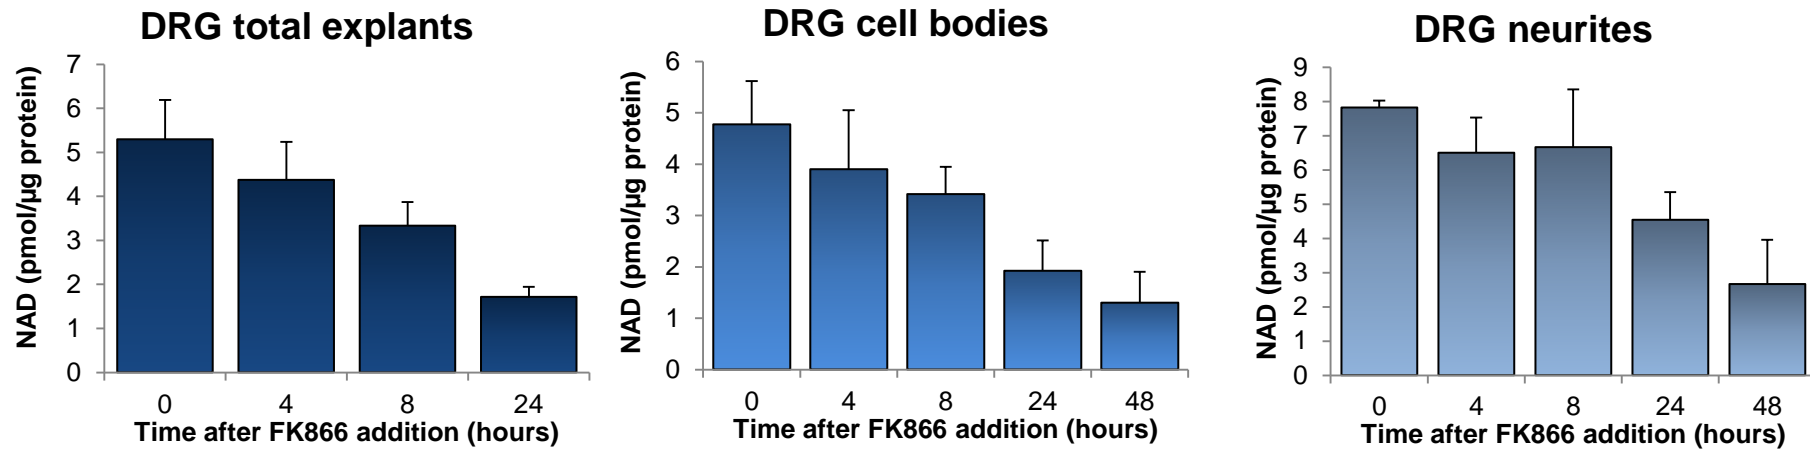

(B)

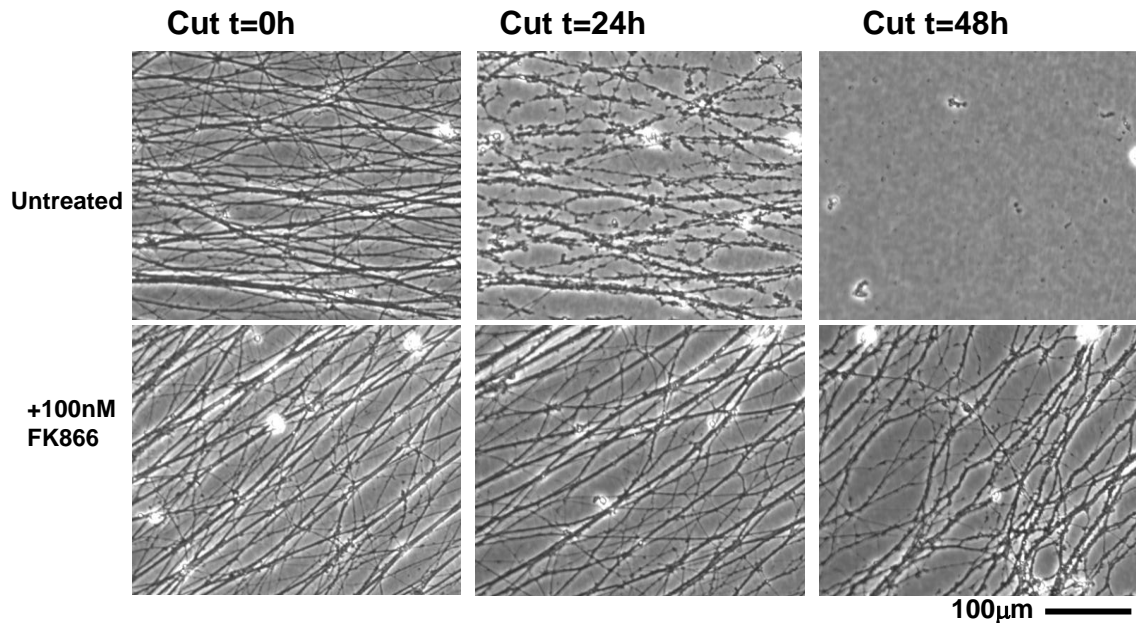

(C)

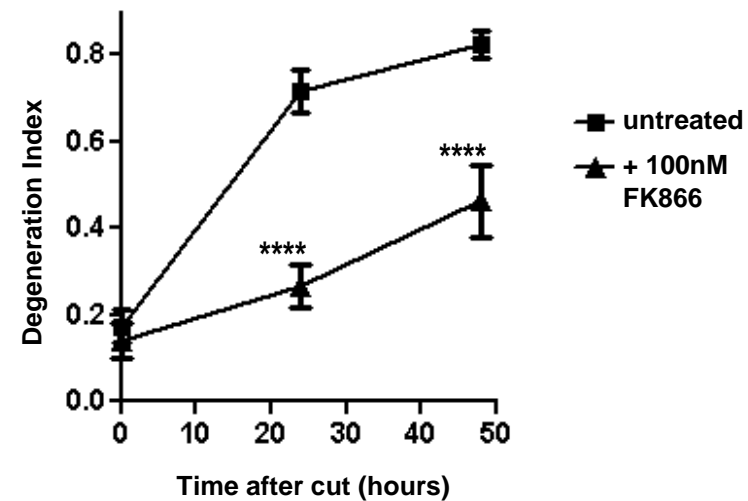

Supplement: cdd2014164x2.pdf [file cdd2014164x2.pdf]

(A)

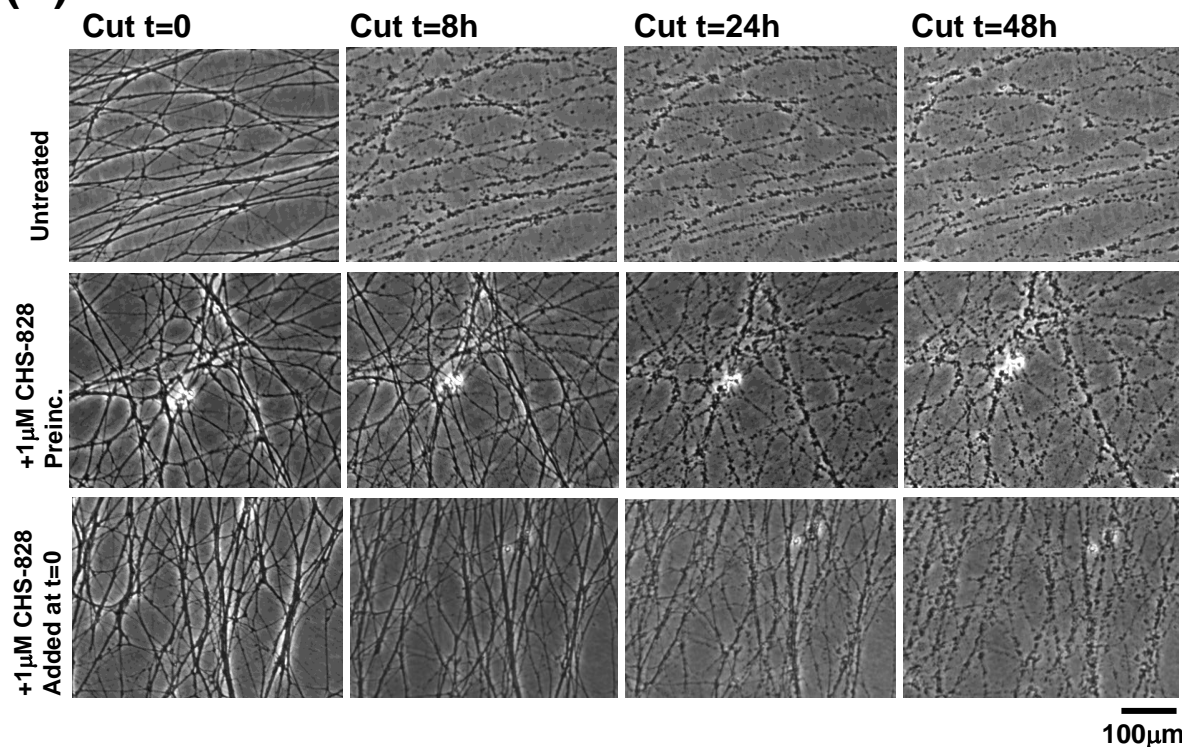

(D)

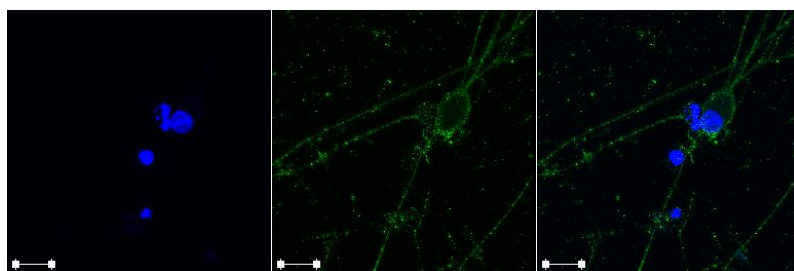

(E)

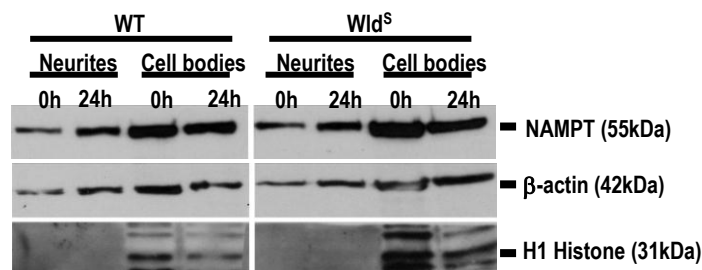

(B)

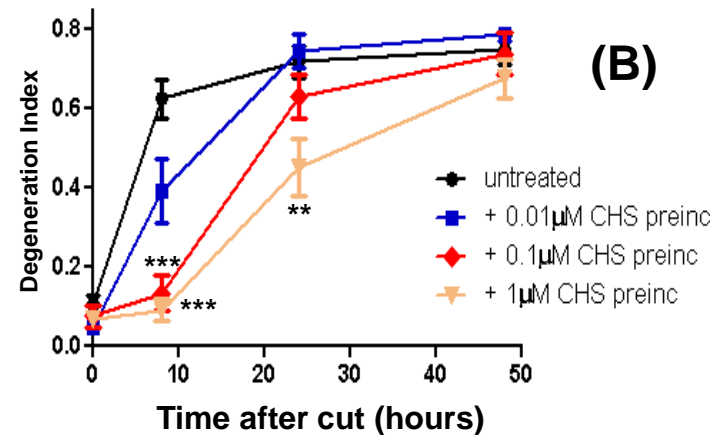

(C)

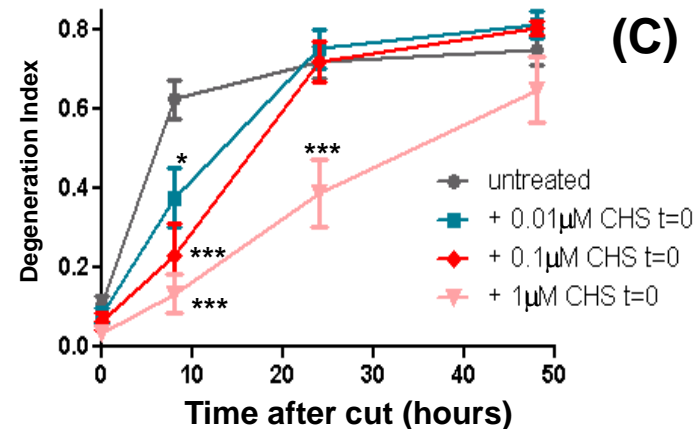

(F)

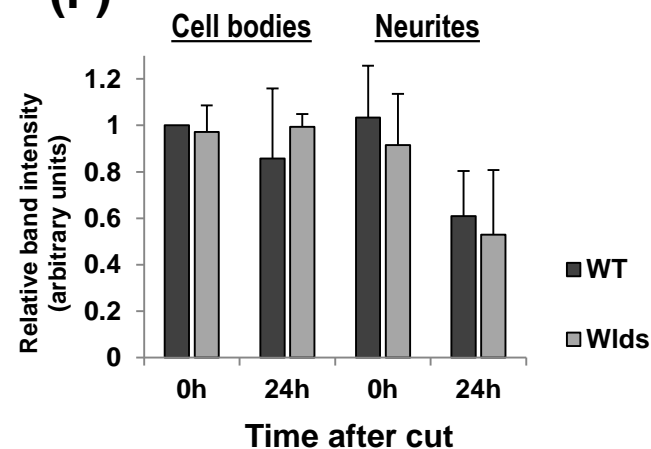

Supplement: cdd2014164x3.pdf [file cdd2014164x3.pdf]

(A)

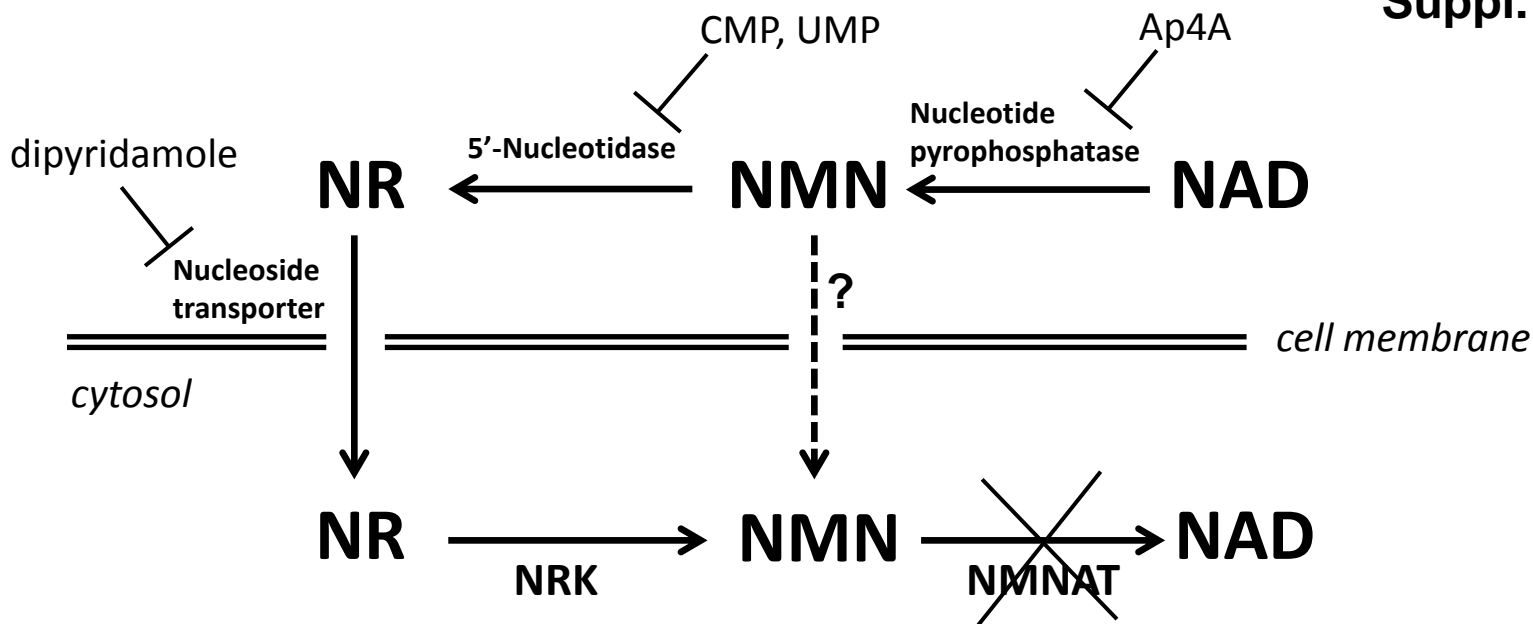

(B)

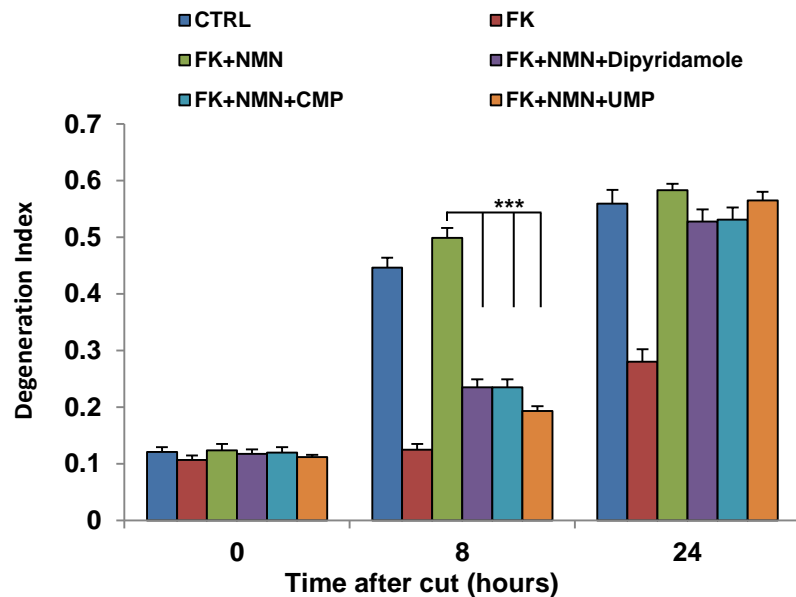

(C)

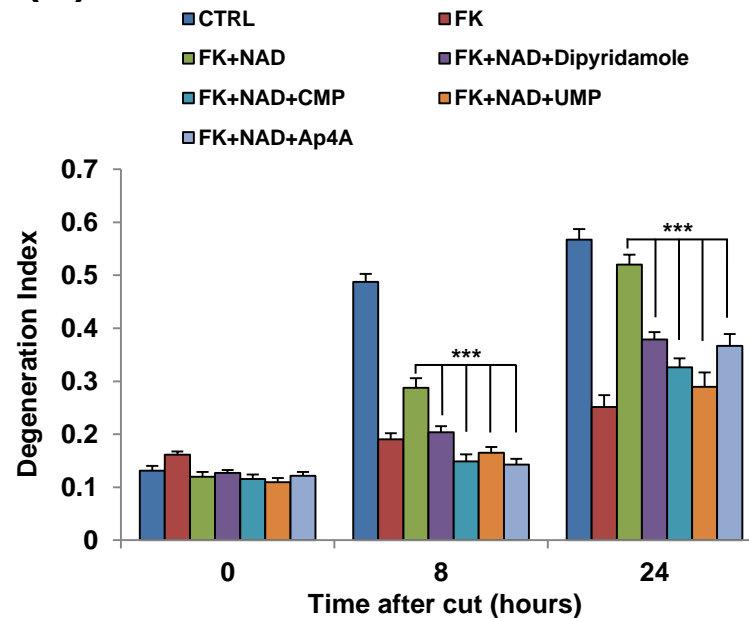

Supplement: cdd2014164x4.pdf [file cdd2014164x4.pdf]

(A)

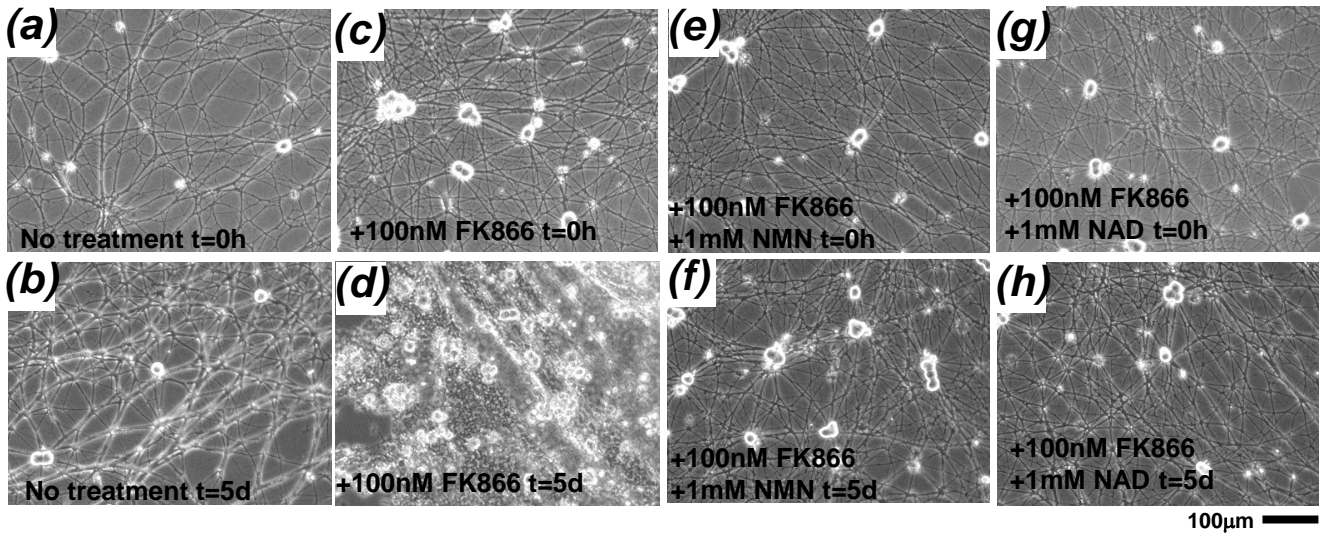Cell bodiesNeurites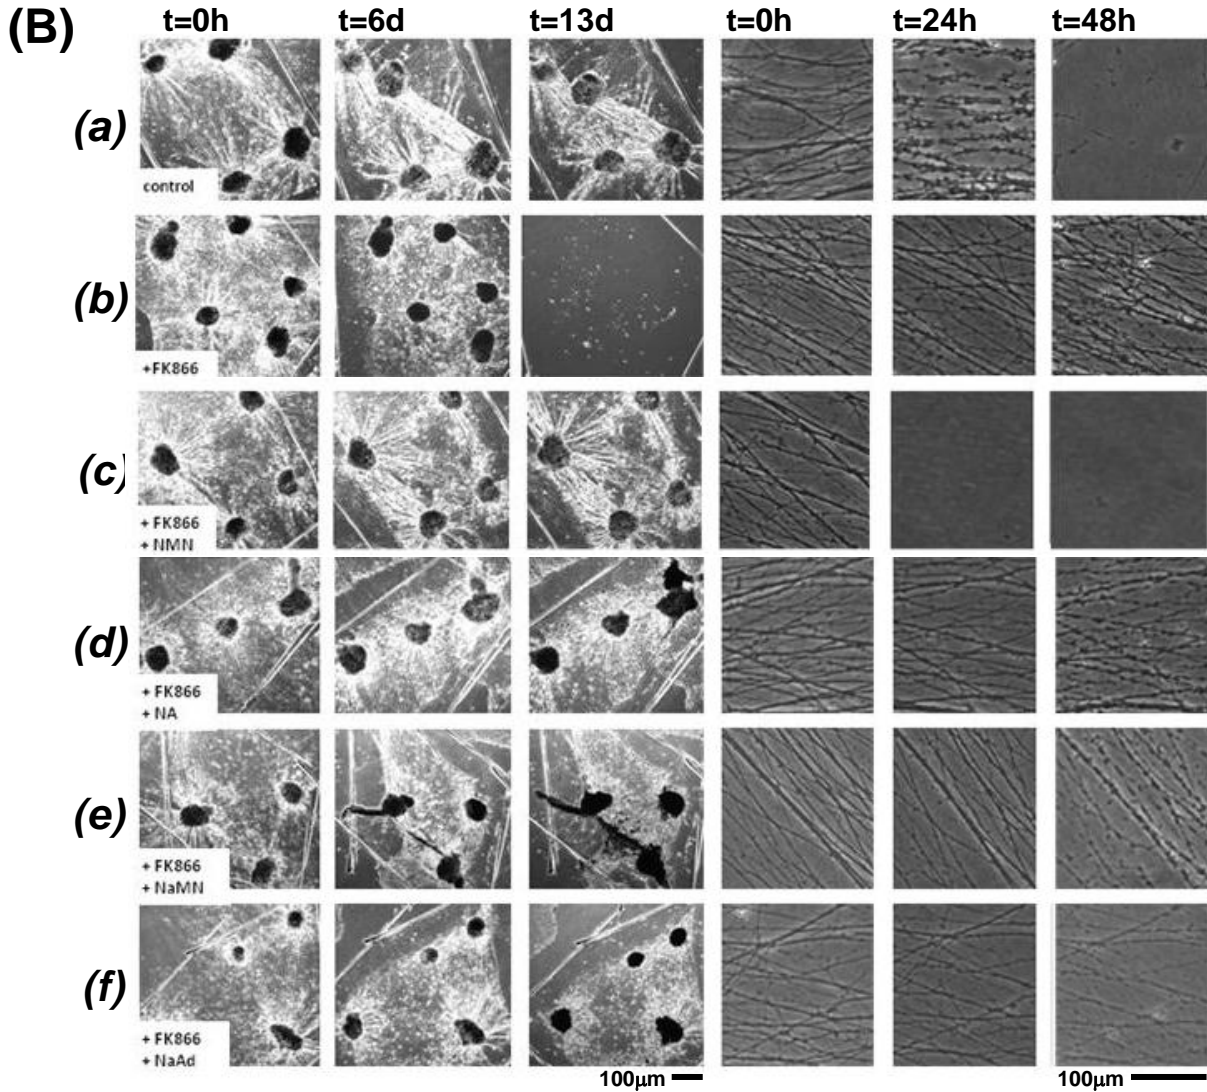

Supplement: cdd2014164x5.pdf [file cdd2014164x5.pdf]

(A)

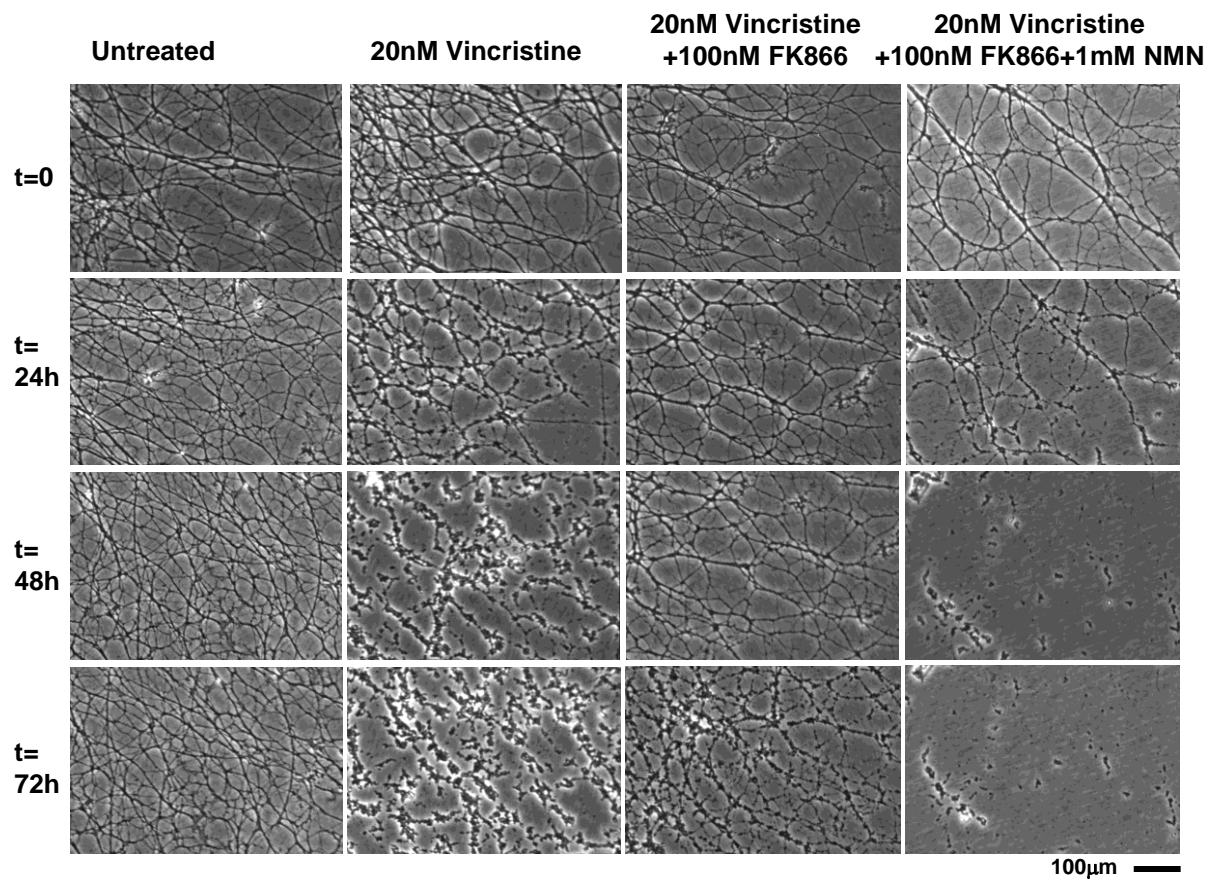

(B)

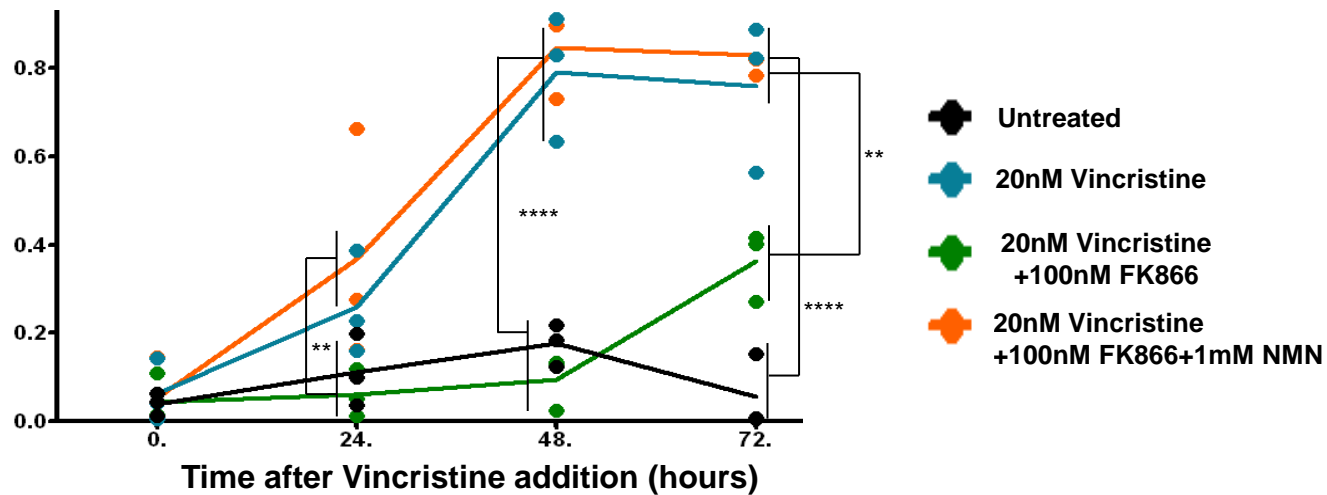

Supplement: cdd2014164x6.pdf [file cdd2014164x6.pdf]

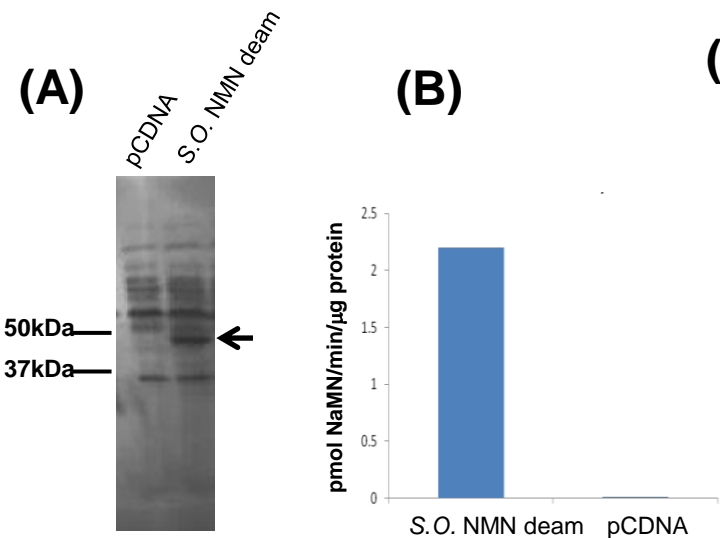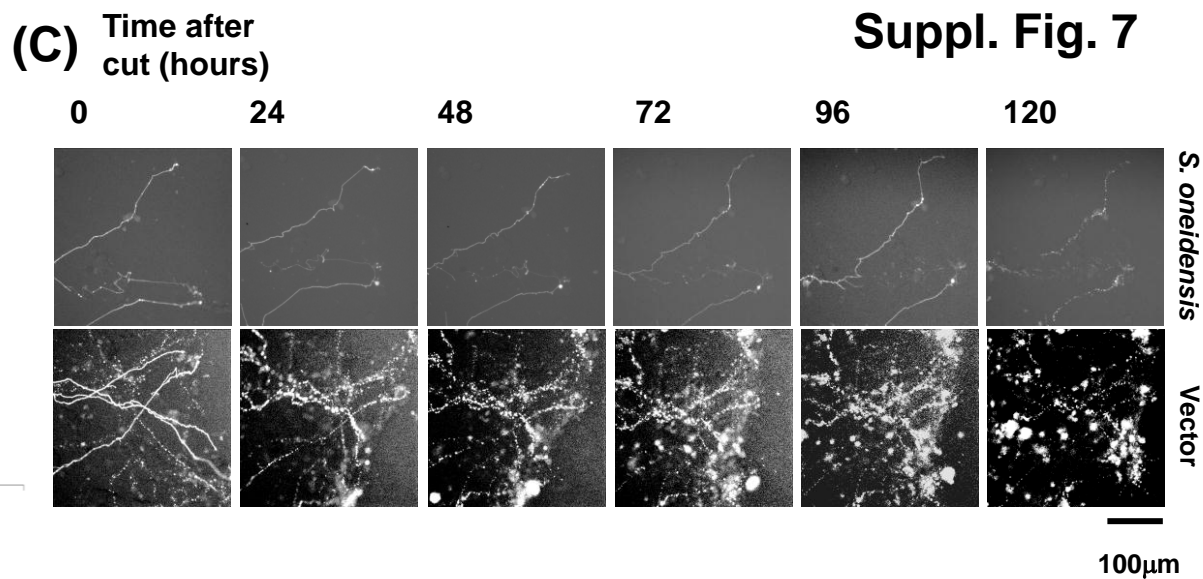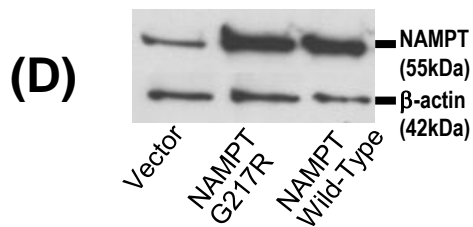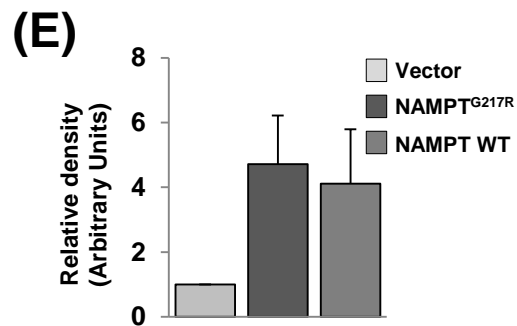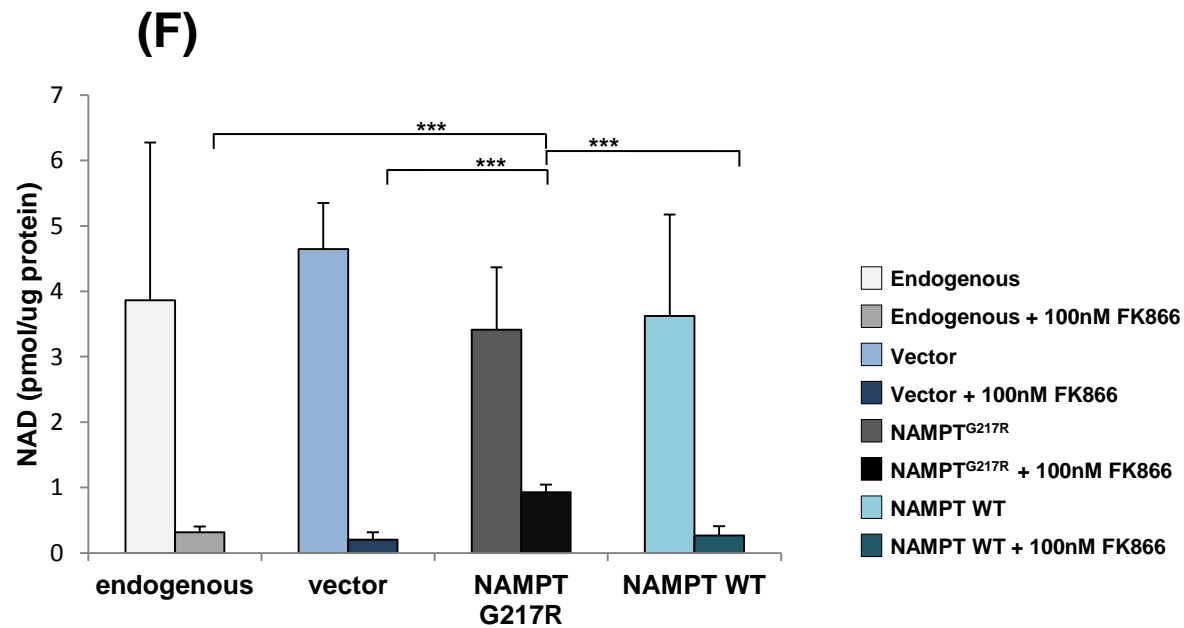

Supplement: cdd2014164x7.pdf [file cdd2014164x7.pdf]

(A)

(a)

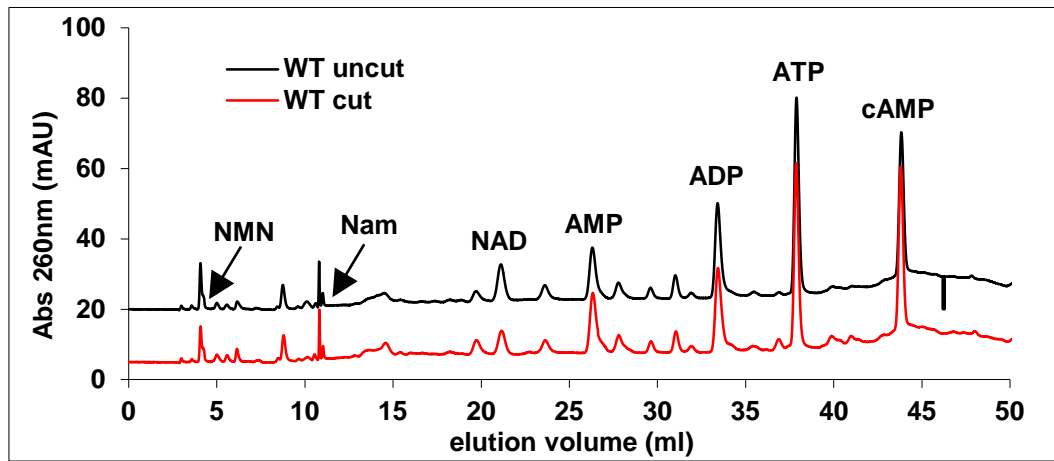

(b)

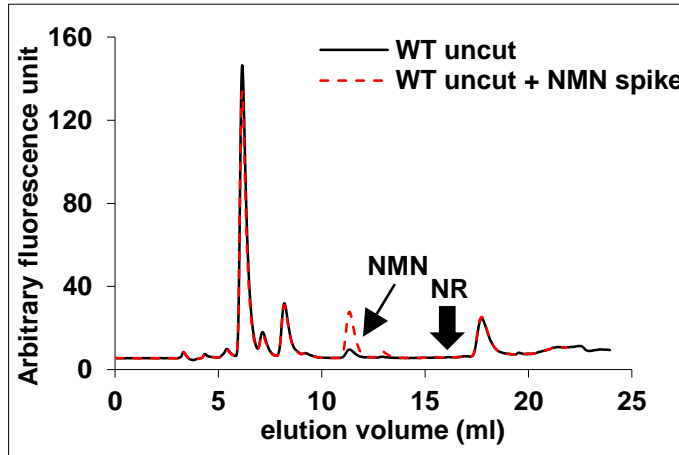

(c)

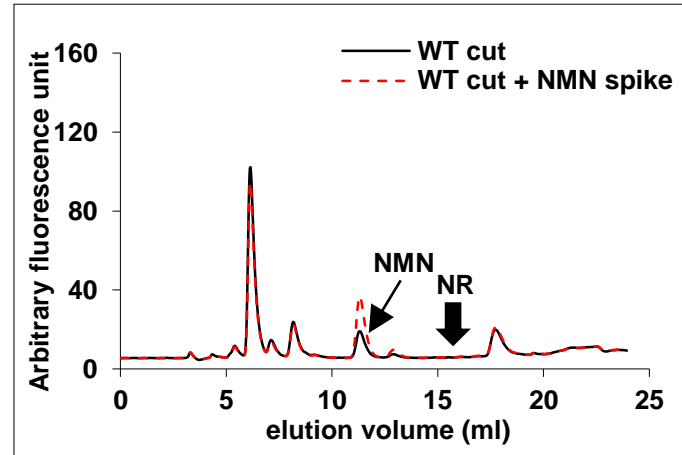

(B)

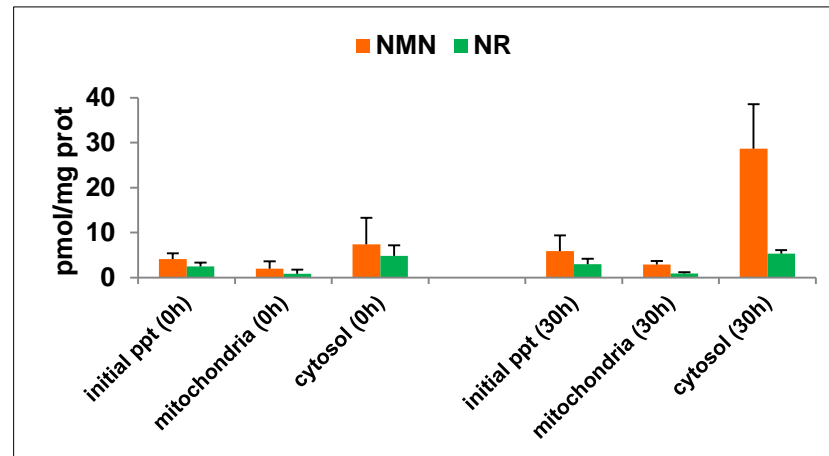

Supplement: cdd2014164x8.pdf [file cdd2014164x8.pdf]

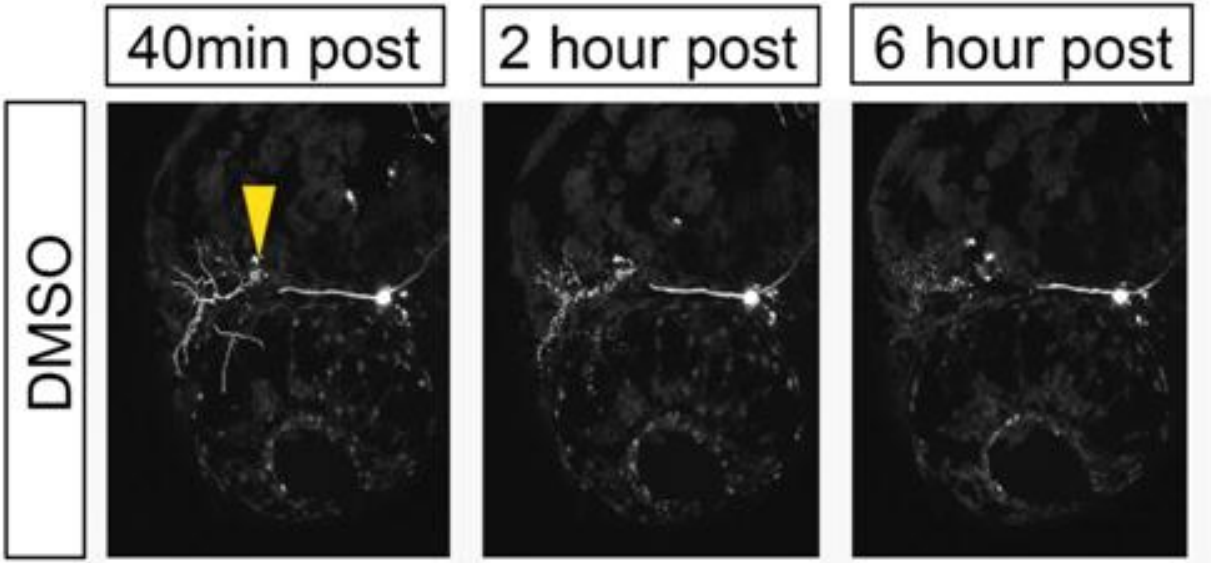

Supplement: cdd2014164x9.pdf [file cdd2014164x9.pdf]
